# Supplementary material for: Pyphe, a python toolbox for assessing microbial growth and cell viability in high-throughput colony screens
Source: eLife. 2020 Jun 16;9:e55160. doi: 10.7554/eLife.55160 (PMC7297533; doi:10.7554/eLife.55160)
Supplement: Supplementary file 1. [file elife-55160-supp1.csv]

### Supplementary material for "Pyphe: A python toolbox for assessing microbial growth and cell viability in high-throughput colony screens" by Kamrad et al. (2020).
### Supplementary Data 1: Corrected maximum slopes and endpoints for 57 wild strains in 8 conditions
###
### Each number is the mean of approximately 16 biological replicates. Strain IDs are the same as in Jeffares et al. (2015).
Condition	Strain	Max-slope-corrected	Endpoint-corrected
EMM_G	JB1110	0.776347134	0.801952105
EMM_G	JB1117	0.738966433	0.809380335
EMM_G	JB1154	0.775276309	0.811301747
EMM_G	JB1171	0.870006424	0.949149554
EMM_G	JB1174	0.89599349	0.928305376
EMM_G	JB1180	0.706910109	0.715704495
EMM_G	JB1197	0.791467368	0.826377609
EMM_G	JB1205	0.969673295	1.043527638
EMM_G	JB1206	0.877727429	0.896262109
EMM_G	JB1207	0.875761758	0.81599014
EMM_G	JB22	0.987652949	0.987475689
EMM_G	JB4	0.978326035	1.234179643
EMM_G	JB758	1.05120847	1.211878591
EMM_G	JB760	0.841440168	1.019109465
EMM_G	JB762	0.738128795	0.78818497
EMM_G	JB837	0.921362656	0.957470897
EMM_G	JB838	0.681251877	0.635263296
EMM_G	JB840	0.772646408	0.828564949
EMM_G	JB841	0.762577795	0.831198579
EMM_G	JB842	0.850767815	0.853432341
EMM_G	JB845	0.860673249	0.949123789
EMM_G	JB846	0.761460369	0.747414746
EMM_G	JB848	0.776818576	0.786909698
EMM_G	JB852	0.614890982	0.615277469
EMM_G	JB853	0.813042024	0.931237858
EMM_G	JB854	0.897965955	0.867439733
EMM_G	JB858	0.794731456	0.892883178
EMM_G	JB862	0.939502153	0.999530388
EMM_G	JB864	0.703463366	0.781592358
EMM_G	JB869	0.860251019	0.830918111
EMM_G	JB870	0.619510812	0.593601934
EMM_G	JB871	0.448975388	0.449819582
EMM_G	JB872	0.45516513	0.532927539
EMM_G	JB873	0.871465327	0.898045124
EMM_G	JB874	0.843031585	0.862162231
EMM_G	JB875	0.881481046	0.985274015
EMM_G	JB878	0.971938305	0.982720477
EMM_G	JB879	0.941489468	1.101412897
EMM_G	JB884	0.713097463	0.667854646
EMM_G	JB899	0.825874299	0.919613455
EMM_G	JB900	0.778773271	0.874880255
EMM_G	JB902	0.853540062	1.014122001
EMM_G	JB910	0.750144656	0.779428977
EMM_G	JB913	0.793240696	0.686223295
EMM_G	JB914	0.239471111	0.29125146
EMM_G	JB916	0.758773759	0.776317618
EMM_G	JB917	0.940355451	1.157919576
EMM_G	JB918	0.856539132	1.046190971
EMM_G	JB929	0.71574719	0.731798958
EMM_G	JB930	0.718136269	0.711535446
EMM_G	JB931	1.034664238	1.098526461
EMM_G	JB934	0.911212409	0.940825251
EMM_G	JB938	1.133500375	1.012142912
EMM_G	JB939	0.908514278	1.025581474
EMM_G	JB942	0.737638992	0.817060311
EMM_G	JB943	0.708074628	0.700020229
EMM_G	JB953	0.788633873	0.731768169
EMM_G	extragrid	0.984170595	0.9809129
EMM_G	grid	1	1
EMM_NH4Cl	JB1110	0.809161749	0.777413734
EMM_NH4Cl	JB1117	1.0180686	0.997543777
EMM_NH4Cl	JB1154	1.07510572	1.019645605
EMM_NH4Cl	JB1171	1.034738659	0.995422711
EMM_NH4Cl	JB1174	1.054292418	1.017642579
EMM_NH4Cl	JB1180	1.224122313	1.120303911
EMM_NH4Cl	JB1197	1.119752012	1.051065769
EMM_NH4Cl	JB1205	1.156718222	1.051509574
EMM_NH4Cl	JB1206	1.117153296	1.04332868
EMM_NH4Cl	JB1207	0.861369669	0.822839119
EMM_NH4Cl	JB22	0.997802048	0.985389227
EMM_NH4Cl	JB4	1.276894323	1.364527001
EMM_NH4Cl	JB758	1.411258061	1.33621995
EMM_NH4Cl	JB760	1.026088334	1.095228727
EMM_NH4Cl	JB762	1.346856427	1.219502012
EMM_NH4Cl	JB837	1.044525792	0.978378701
EMM_NH4Cl	JB838	0.952706223	0.914572336
EMM_NH4Cl	JB840	1.11042508	1.066910734
EMM_NH4Cl	JB841	1.12207819	1.096245712
EMM_NH4Cl	JB842	1.091795688	0.979304492
EMM_NH4Cl	JB845	1.069206961	1.042127017
EMM_NH4Cl	JB846	0.855229123	0.871291816
EMM_NH4Cl	JB848	1.309951548	1.194681516
EMM_NH4Cl	JB852	0.653678622	0.67758709
EMM_NH4Cl	JB853	1.216137327	1.156673999
EMM_NH4Cl	JB854	1.078044442	1.050726566
EMM_NH4Cl	JB858	0.949023472	0.913579328
EMM_NH4Cl	JB862	1.086091773	1.029048057
EMM_NH4Cl	JB864	1.065051717	0.997709276
EMM_NH4Cl	JB869	0.913110058	0.901786528
EMM_NH4Cl	JB870	0.752141839	0.682235701
EMM_NH4Cl	JB871	0.415201939	0.423524488
EMM_NH4Cl	JB872	0.687303917	0.648090342
EMM_NH4Cl	JB873	1.164803995	1.047955782
EMM_NH4Cl	JB874	1.160604124	1.099340158
EMM_NH4Cl	JB875	1.178938469	1.15412704
EMM_NH4Cl	JB878	1.344562659	1.273617715
EMM_NH4Cl	JB879	1.269714697	1.198275308
EMM_NH4Cl	JB884	1.090387452	1.049355702
EMM_NH4Cl	JB899	1.443409408	1.410864068
EMM_NH4Cl	JB900	0.878815626	0.92114908
EMM_NH4Cl	JB902	1.114093394	1.119113604
EMM_NH4Cl	JB910	1.029770035	0.935707579
EMM_NH4Cl	JB913	0.935609615	0.911903403
EMM_NH4Cl	JB914	0.444322953	0.48169712
EMM_NH4Cl	JB916	1.072762581	1.010681978
EMM_NH4Cl	JB917	1.704240655	1.77112456
EMM_NH4Cl	JB918	1.253480759	1.250520842
EMM_NH4Cl	JB929	0.837950301	0.767388997
EMM_NH4Cl	JB930	0.780952934	0.744639102
EMM_NH4Cl	JB931	1.173166939	1.135001794
EMM_NH4Cl	JB934	1.058801863	0.945438231
EMM_NH4Cl	JB938	1.167934774	1.142407476
EMM_NH4Cl	JB939	0.966678626	0.972624057
EMM_NH4Cl	JB942	0.768790977	0.82738406
EMM_NH4Cl	JB943	0.964595581	0.964251589
EMM_NH4Cl	JB953	1.038431003	1.022777721
EMM_NH4Cl	extragrid	0.987881181	0.962353863
EMM_NH4Cl	grid	1	1
EMM_R	JB1110	0.544460398	0.455966678
EMM_R	JB1117	0.60359263	0.522426942
EMM_R	JB1154	0.524328037	0.438380466
EMM_R	JB1171	0.799351889	0.727665205
EMM_R	JB1174	0.762111729	0.703500201
EMM_R	JB1180	0.821523585	0.731358712
EMM_R	JB1197	0.856465891	0.731055684
EMM_R	JB1205	0.734489171	0.679703908
EMM_R	JB1206	0.692688536	0.713701576
EMM_R	JB1207	0.572307368	0.576365767
EMM_R	JB22	0.979576671	0.972672549
EMM_R	JB4	0.826267307	0.772724362
EMM_R	JB758	1.078525596	0.997721312
EMM_R	JB760	0.8293331	0.748400517
EMM_R	JB762	1.082463281	0.852652592
EMM_R	JB837	0.812762398	0.68055104
EMM_R	JB838	0.69511559	0.531150378
EMM_R	JB840	0.876122196	0.771854218
EMM_R	JB841	0.866717412	0.719538836
EMM_R	JB842	0.961592744	0.822893455
EMM_R	JB845	0.867379188	0.774336582
EMM_R	JB846	0.568344911	0.430235549
EMM_R	JB848	0.966149131	0.89901115
EMM_R	JB852	0.739730157	0.494533656
EMM_R	JB853	1.185031074	1.145567309
EMM_R	JB854	0.894476812	0.813912872
EMM_R	JB858	0.828818651	0.669501336
EMM_R	JB862	0.820928771	0.777762781
EMM_R	JB864	0.40118586	0.393333625
EMM_R	JB869	0.72821066	0.652186132
EMM_R	JB870	0.348810218	0.28677706
EMM_R	JB871	0.299934758	0.242026289
EMM_R	JB872	0.354469993	0.263280779
EMM_R	JB873	0.914074652	0.829911978
EMM_R	JB874	0.451075275	0.383832161
EMM_R	JB875	0.869951907	0.810402488
EMM_R	JB878	1.034752125	0.921089949
EMM_R	JB879	0.80339188	0.772325327
EMM_R	JB884	0.788315399	0.768871734
EMM_R	JB899	1.133412637	1.069015187
EMM_R	JB900	0.793915027	0.696810262
EMM_R	JB902	0.921495465	0.889488565
EMM_R	JB910	0.811759959	0.599236429
EMM_R	JB913	0.630705343	0.500045076
EMM_R	JB914	0.428197091	0.114454616
EMM_R	JB916	0.964156646	0.718889316
EMM_R	JB917	1.245086314	1.239734755
EMM_R	JB918	0.98906566	0.911756738
EMM_R	JB929	0.604666461	0.551414991
EMM_R	JB930	0.591907403	0.525154194
EMM_R	JB931	0.633449777	0.636687211
EMM_R	JB934	0.716955972	0.658497181
EMM_R	JB938	0.732920485	0.773021439
EMM_R	JB939	0.716119924	0.643155394
EMM_R	JB942	0.548865255	0.50871595
EMM_R	JB943	0.591795348	0.535286245
EMM_R	JB953	0.47589541	0.437167258
EMM_R	extragrid	0.978929198	0.963593303
EMM_R	grid	1	1
EMM_V	JB1110	0.434593328	0.528575608
EMM_V	JB1117	0.521803514	0.62205958
EMM_V	JB1154	0.781876555	0.85104452
EMM_V	JB1171	0.634777784	0.77432477
EMM_V	JB1174	0.65022667	0.762506618
EMM_V	JB1180	0.684890149	0.749095219
EMM_V	JB1197	0.67620145	0.751094153
EMM_V	JB1205	1.001172443	0.997288488
EMM_V	JB1206	0.837641887	0.884832782
EMM_V	JB1207	0.512707539	0.595252427
EMM_V	JB22	0.988221046	0.982149178
EMM_V	JB4	0.95022696	1.09423834
EMM_V	JB758	0.621791037	0.759331407
EMM_V	JB760	0.787713525	0.887280009
EMM_V	JB762	0.946737644	0.949755156
EMM_V	JB837	0.594847069	0.651894381
EMM_V	JB838	0.560853263	0.63548178
EMM_V	JB840	0.698171588	0.789089431
EMM_V	JB841	0.707938664	0.793664724
EMM_V	JB842	0.799513221	0.851947933
EMM_V	JB845	0.779351431	0.876818605
EMM_V	JB846	0.656224875	0.710623597
EMM_V	JB848	0.779745261	0.757878032
EMM_V	JB852	0.477079379	0.509005242
EMM_V	JB853	0.656337454	0.808607108
EMM_V	JB854	0.736002562	0.783119481
EMM_V	JB858	0.688631158	0.745884941
EMM_V	JB862	0.592866136	0.696300272
EMM_V	JB864	0.566018675	0.622658683
EMM_V	JB869	0.780403999	0.823102059
EMM_V	JB870	0.443503142	0.476168179
EMM_V	JB871	0.26977267	0.303515172
EMM_V	JB872	0.365692661	0.436169262
EMM_V	JB873	0.723862354	0.790808026
EMM_V	JB874	0.892774577	0.881528502
EMM_V	JB875	0.726920301	0.80885207
EMM_V	JB878	0.820616842	0.885889885
EMM_V	JB879	0.827984618	0.991860158
EMM_V	JB884	0.67378542	0.724348201
EMM_V	JB899	1.099982965	1.098074743
EMM_V	JB900	0.520298874	0.676951824
EMM_V	JB902	0.771038207	0.911646941
EMM_V	JB910	0.825398294	0.726003581
EMM_V	JB913	0.835283574	0.838252551
EMM_V	JB914	0.222313821	0.25057407
EMM_V	JB916	0.803437158	0.776808145
EMM_V	JB917	1.111528318	1.271408324
EMM_V	JB918	0.700333293	0.832860182
EMM_V	JB929	0.503069756	0.552908516
EMM_V	JB930	0.458981067	0.499699434
EMM_V	JB931	0.763037518	0.835810483
EMM_V	JB934	0.801070379	0.864028508
EMM_V	JB938	0.75616513	0.869566992
EMM_V	JB939	0.572574631	0.672141973
EMM_V	JB942	0.551589911	0.681670255
EMM_V	JB943	0.732029604	0.764136092
EMM_V	JB953	0.705762771	0.747066127
EMM_V	extragrid	0.97944237	0.967558526
EMM_V	grid	1	1
YES	JB1110	0.248578283	0.268616443
YES	JB1117	1.117381873	1.105316332
YES	JB1154	0.908919736	0.869708747
YES	JB1171	0.859535919	0.836764421
YES	JB1174	0.853550254	0.803006248
YES	JB1180	0.900811977	0.838570502
YES	JB1197	0.891230985	0.875298426
YES	JB1205	0.671623016	0.690388464
YES	JB1206	0.892006692	0.903609397
YES	JB1207	0.596982486	0.66409877
YES	JB22	0.929131899	0.918219712
YES	JB4	0.9603175	1.10318255
YES	JB758	1.063418416	0.911087471
YES	JB760	0.858095619	0.841520612
YES	JB762	1.221284804	1.090631611
YES	JB837	0.884761304	0.786950008
YES	JB838	0.639264409	0.593363797
YES	JB840	0.907432279	0.90830677
YES	JB841	1.005503497	0.970716624
YES	JB842	0.94488722	0.899142152
YES	JB845	0.940873003	0.892858845
YES	JB846	0.755532332	0.705476862
YES	JB848	1.134510293	1.039885468
YES	JB852	0.742716724	0.727954666
YES	JB853	1.157486723	1.123243148
YES	JB854	0.890534224	0.89310854
YES	JB858	0.949056951	0.895194946
YES	JB862	0.739190466	0.73963387
YES	JB864	0.700753986	0.719980924
YES	JB869	0.574186788	0.530269598
YES	JB870	0.467052983	0.468218661
YES	JB871	0.372732781	0.367734305
YES	JB872	0.628197993	0.57833743
YES	JB873	1.035812037	0.977625529
YES	JB874	0.82148474	0.807366569
YES	JB875	1.026722628	0.93539291
YES	JB878	0.935146596	0.916081759
YES	JB879	0.943900781	0.912623561
YES	JB884	0.762774122	0.769265199
YES	JB899	1.384732728	1.28812721
YES	JB900	0.914163916	0.885569918
YES	JB902	0.896098174	0.86114754
YES	JB910	0.781563682	0.663857999
YES	JB913	0.810647798	0.787420336
YES	JB914	0.336902243	0.370590055
YES	JB916	1.350811257	1.010949544
YES	JB917	1.164492021	1.095067632
YES	JB918	0.941870649	0.864003252
YES	JB929	0.892000512	0.807849913
YES	JB930	0.908837082	0.812814361
YES	JB931	0.924803493	0.86546111
YES	JB934	0.808501825	0.758585156
YES	JB938	0.888201844	0.849454948
YES	JB939	0.858282381	0.853437445
YES	JB942	0.826723097	0.751797325
YES	JB943	0.588738819	0.539501617
YES	JB953	0.553021879	0.661261778
YES	extragrid	0.996509336	0.97024938
YES	grid	1	1
YES_0.1gluc_3glycerol	JB1110	0.063035001	0.092990506
YES_0.1gluc_3glycerol	JB1117	1.100381893	0.975987321
YES_0.1gluc_3glycerol	JB1154	0.870351966	0.677331733
YES_0.1gluc_3glycerol	JB1171	0.944432998	0.729417168
YES_0.1gluc_3glycerol	JB1174	1.008679431	0.782671353
YES_0.1gluc_3glycerol	JB1180	0.877990622	0.695076061
YES_0.1gluc_3glycerol	JB1197	0.612316868	0.650338122
YES_0.1gluc_3glycerol	JB1205	0.363477141	0.308606354
YES_0.1gluc_3glycerol	JB1206	0.605074135	0.426239413
YES_0.1gluc_3glycerol	JB1207	1.180871554	1.037212629
YES_0.1gluc_3glycerol	JB22	0.980280891	0.984443972
YES_0.1gluc_3glycerol	JB4	2.011640043	1.625407938
YES_0.1gluc_3glycerol	JB758	1.22202817	1.288765008
YES_0.1gluc_3glycerol	JB760	1.025547466	0.983827148
YES_0.1gluc_3glycerol	JB762	0.763012061	0.747507563
YES_0.1gluc_3glycerol	JB837	0.871030496	0.806420151
YES_0.1gluc_3glycerol	JB838	0.622315208	0.616691643
YES_0.1gluc_3glycerol	JB840	0.731845197	0.692200615
YES_0.1gluc_3glycerol	JB841	0.9140139	0.981723409
YES_0.1gluc_3glycerol	JB842	0.753209636	0.761185089
YES_0.1gluc_3glycerol	JB845	0.629268794	0.508288632
YES_0.1gluc_3glycerol	JB846	0.893730146	0.846738255
YES_0.1gluc_3glycerol	JB848	0.579798594	0.564376978
YES_0.1gluc_3glycerol	JB852	0.29151982	0.27357466
YES_0.1gluc_3glycerol	JB853	1.248285086	0.912508408
YES_0.1gluc_3glycerol	JB854	0.82143738	0.726195853
YES_0.1gluc_3glycerol	JB858	0.575043732	0.617070658
YES_0.1gluc_3glycerol	JB862	0.45366489	0.379593328
YES_0.1gluc_3glycerol	JB864	0.689973184	0.601706804
YES_0.1gluc_3glycerol	JB869	0.888773413	0.765100092
YES_0.1gluc_3glycerol	JB870	0.580388327	0.461664753
YES_0.1gluc_3glycerol	JB871	0.420720924	0.360729416
YES_0.1gluc_3glycerol	JB872	0.467735096	0.405442532
YES_0.1gluc_3glycerol	JB873	0.708894734	0.769649684
YES_0.1gluc_3glycerol	JB874	0.759403827	0.58446073
YES_0.1gluc_3glycerol	JB875	0.978269312	0.839122313
YES_0.1gluc_3glycerol	JB878	0.879535291	0.865903361
YES_0.1gluc_3glycerol	JB879	1.351838349	1.185045324
YES_0.1gluc_3glycerol	JB884	0.95973261	0.958523884
YES_0.1gluc_3glycerol	JB899	1.357252822	1.310062381
YES_0.1gluc_3glycerol	JB900	1.07524977	0.697111271
YES_0.1gluc_3glycerol	JB902	1.403641636	1.205222793
YES_0.1gluc_3glycerol	JB910	0.748244654	0.572907304
YES_0.1gluc_3glycerol	JB913	0.84163147	0.710711324
YES_0.1gluc_3glycerol	JB914	0.811723859	0.757070774
YES_0.1gluc_3glycerol	JB916	1.261718967	1.028554627
YES_0.1gluc_3glycerol	JB917	1.321648102	1.096495105
YES_0.1gluc_3glycerol	JB918	0.375548214	0.361525532
YES_0.1gluc_3glycerol	JB929	0.411193625	0.422261923
YES_0.1gluc_3glycerol	JB930	0.331513144	0.33775038
YES_0.1gluc_3glycerol	JB931	0.408877759	0.422539946
YES_0.1gluc_3glycerol	JB934	0.888636179	0.711607524
YES_0.1gluc_3glycerol	JB938	0.699675139	0.635972128
YES_0.1gluc_3glycerol	JB939	0.966978556	0.902212605
YES_0.1gluc_3glycerol	JB942	0.974237462	0.908191719
YES_0.1gluc_3glycerol	JB943	0.218406897	0.248182316
YES_0.1gluc_3glycerol	JB953	1.649112507	1.617214543
YES_0.1gluc_3glycerol	extragrid	0.988267959	0.984066333
YES_0.1gluc_3glycerol	grid	1	1
YES_0.5gluc_3EtOH	JB1110	0.227768409	0.203581862
YES_0.5gluc_3EtOH	JB1117	0.524653999	0.555785553
YES_0.5gluc_3EtOH	JB1154	0.714052215	0.642566046
YES_0.5gluc_3EtOH	JB1171	0.968473325	0.873063654
YES_0.5gluc_3EtOH	JB1174	0.927040448	0.826106867
YES_0.5gluc_3EtOH	JB1180	0.898976874	0.81608696
YES_0.5gluc_3EtOH	JB1197	0.783883558	0.70568612
YES_0.5gluc_3EtOH	JB1205	0.876163734	0.674903315
YES_0.5gluc_3EtOH	JB1206	0.79962063	0.606999108
YES_0.5gluc_3EtOH	JB1207	0.859120862	0.776063526
YES_0.5gluc_3EtOH	JB22	0.992609414	0.978723356
YES_0.5gluc_3EtOH	JB4	1.03370915	1.044849085
YES_0.5gluc_3EtOH	JB758	0.935333581	0.897841464
YES_0.5gluc_3EtOH	JB760	0.986785416	0.911348518
YES_0.5gluc_3EtOH	JB762	0.840409558	0.686510252
YES_0.5gluc_3EtOH	JB837	0.718303427	0.700658717
YES_0.5gluc_3EtOH	JB838	0.655905065	0.609243322
YES_0.5gluc_3EtOH	JB840	0.799816708	0.721858372
YES_0.5gluc_3EtOH	JB841	0.810035816	0.797377066
YES_0.5gluc_3EtOH	JB842	0.854003061	0.796111846
YES_0.5gluc_3EtOH	JB845	0.93043538	0.808648874
YES_0.5gluc_3EtOH	JB846	0.66417225	0.661269265
YES_0.5gluc_3EtOH	JB848	1.032258999	0.84492186
YES_0.5gluc_3EtOH	JB852	0.509916874	0.465881721
YES_0.5gluc_3EtOH	JB853	1.0909742	1.00012377
YES_0.5gluc_3EtOH	JB854	0.915198611	0.806573046
YES_0.5gluc_3EtOH	JB858	0.70051795	0.712758724
YES_0.5gluc_3EtOH	JB862	0.717818131	0.708811665
YES_0.5gluc_3EtOH	JB864	0.645913906	0.563284673
YES_0.5gluc_3EtOH	JB869	0.793065145	0.806268823
YES_0.5gluc_3EtOH	JB870	0.37633373	0.421976815
YES_0.5gluc_3EtOH	JB871	0.310488363	0.264257402
YES_0.5gluc_3EtOH	JB872	0.464714404	0.431243255
YES_0.5gluc_3EtOH	JB873	0.943718227	0.793382212
YES_0.5gluc_3EtOH	JB874	0.821975246	0.759838776
YES_0.5gluc_3EtOH	JB875	0.839860469	0.774819865
YES_0.5gluc_3EtOH	JB878	1.119588653	0.989354095
YES_0.5gluc_3EtOH	JB879	1.02704242	0.969038906
YES_0.5gluc_3EtOH	JB884	0.810587314	0.757531398
YES_0.5gluc_3EtOH	JB899	1.077286899	0.976748456
YES_0.5gluc_3EtOH	JB900	0.864787705	0.835213928
YES_0.5gluc_3EtOH	JB902	0.807351988	0.792082662
YES_0.5gluc_3EtOH	JB910	0.70964697	0.70272781
YES_0.5gluc_3EtOH	JB913	0.714757722	0.673377612
YES_0.5gluc_3EtOH	JB914	0.296790395	0.25137917
YES_0.5gluc_3EtOH	JB916	0.85924341	0.825432909
YES_0.5gluc_3EtOH	JB917	1.184693271	1.055527672
YES_0.5gluc_3EtOH	JB918	0.93053679	0.808484414
YES_0.5gluc_3EtOH	JB929	0.887374425	0.691396014
YES_0.5gluc_3EtOH	JB930	0.877501562	0.663355926
YES_0.5gluc_3EtOH	JB931	0.864860009	0.710121692
YES_0.5gluc_3EtOH	JB934	0.802923333	0.70864462
YES_0.5gluc_3EtOH	JB938	0.897982746	0.811069004
YES_0.5gluc_3EtOH	JB939	0.572343842	0.598192496
YES_0.5gluc_3EtOH	JB942	0.670126328	0.716999562
YES_0.5gluc_3EtOH	JB943	0.655455014	0.492166304
YES_0.5gluc_3EtOH	JB953	0.782684862	0.642556012
YES_0.5gluc_3EtOH	extragrid	0.986325579	0.970574272
YES_0.5gluc_3EtOH	grid	1	1
YES_1.5gluc_1.5glyc	JB1110	0.263221135	0.266198761
YES_1.5gluc_1.5glyc	JB1117	0.692459061	0.789562222
YES_1.5gluc_1.5glyc	JB1154	0.807835732	0.828287675
YES_1.5gluc_1.5glyc	JB1171	0.839100375	0.858389393
YES_1.5gluc_1.5glyc	JB1174	0.826162232	0.809756253
YES_1.5gluc_1.5glyc	JB1180	0.827369972	0.776667001
YES_1.5gluc_1.5glyc	JB1197	0.73810337	0.792499533
YES_1.5gluc_1.5glyc	JB1205	0.880408149	0.813751897
YES_1.5gluc_1.5glyc	JB1206	0.713750864	0.764408663
YES_1.5gluc_1.5glyc	JB1207	0.724434198	0.805388363
YES_1.5gluc_1.5glyc	JB22	0.976747742	0.968071613
YES_1.5gluc_1.5glyc	JB4	0.884549309	1.05605547
YES_1.5gluc_1.5glyc	JB758	0.941151027	0.875222434
YES_1.5gluc_1.5glyc	JB760	0.855174483	0.913111709
YES_1.5gluc_1.5glyc	JB762	0.793322	0.738186649
YES_1.5gluc_1.5glyc	JB837	0.785910302	0.7239694
YES_1.5gluc_1.5glyc	JB838	0.715540859	0.675135022
YES_1.5gluc_1.5glyc	JB840	0.756762675	0.839471567
YES_1.5gluc_1.5glyc	JB841	0.750168649	0.810609064
YES_1.5gluc_1.5glyc	JB842	0.777128671	0.853912139
YES_1.5gluc_1.5glyc	JB845	0.847591722	0.883616388
YES_1.5gluc_1.5glyc	JB846	0.626126307	0.611281495
YES_1.5gluc_1.5glyc	JB848	0.990443067	1.048600663
YES_1.5gluc_1.5glyc	JB852	0.513758559	0.545618328
YES_1.5gluc_1.5glyc	JB853	0.919580696	0.979474271
YES_1.5gluc_1.5glyc	JB854	0.801922608	0.835953087
YES_1.5gluc_1.5glyc	JB858	0.782389278	0.809650199
YES_1.5gluc_1.5glyc	JB862	0.668136923	0.669394767
YES_1.5gluc_1.5glyc	JB864	0.68478278	0.682205155
YES_1.5gluc_1.5glyc	JB869	0.714413791	0.74671661
YES_1.5gluc_1.5glyc	JB870	0.492254585	0.456625221
YES_1.5gluc_1.5glyc	JB871	0.307181506	0.336491127
YES_1.5gluc_1.5glyc	JB872	0.482540725	0.488816584
YES_1.5gluc_1.5glyc	JB873	0.915491358	0.886626491
YES_1.5gluc_1.5glyc	JB874	0.7904424	0.8309943
YES_1.5gluc_1.5glyc	JB875	0.915441475	0.901675722
YES_1.5gluc_1.5glyc	JB878	0.999288709	1.001376501
YES_1.5gluc_1.5glyc	JB879	0.994703235	0.949882145
YES_1.5gluc_1.5glyc	JB884	0.763424322	0.78745973
YES_1.5gluc_1.5glyc	JB899	1.087435962	1.105521931
YES_1.5gluc_1.5glyc	JB900	0.760834704	0.790617182
YES_1.5gluc_1.5glyc	JB902	0.803279285	0.859853084
YES_1.5gluc_1.5glyc	JB910	0.711353041	0.656413346
YES_1.5gluc_1.5glyc	JB913	0.670704967	0.691421612
YES_1.5gluc_1.5glyc	JB914	0.381421292	0.45479028
YES_1.5gluc_1.5glyc	JB916	0.841712145	0.755557486
YES_1.5gluc_1.5glyc	JB917	1.208647793	1.165856874
YES_1.5gluc_1.5glyc	JB918	0.936151005	0.852032574
YES_1.5gluc_1.5glyc	JB929	0.859108479	0.792339565
YES_1.5gluc_1.5glyc	JB930	0.845646801	0.781784138
YES_1.5gluc_1.5glyc	JB931	0.884814297	0.823750825
YES_1.5gluc_1.5glyc	JB934	0.839912042	0.7386943
YES_1.5gluc_1.5glyc	JB938	0.874961575	0.820884093
YES_1.5gluc_1.5glyc	JB939	0.720180002	0.78950037
YES_1.5gluc_1.5glyc	JB942	0.716721793	0.762881086
YES_1.5gluc_1.5glyc	JB943	0.634465663	0.548413499
YES_1.5gluc_1.5glyc	JB953	0.651587784	0.638496661
YES_1.5gluc_1.5glyc	extragrid	0.982976551	0.960033221
YES_1.5gluc_1.5glyc	grid	1	1
YES_150NaCl	JB1110	0.308810065	0.158118136
YES_150NaCl	JB1117	0.295489554	0.106852768
YES_150NaCl	JB1154	0.625316311	0.437926617
YES_150NaCl	JB1171	1.101245521	0.906554408
YES_150NaCl	JB1174	1.229186583	1.015924346
YES_150NaCl	JB1180	0.734344391	0.613786171
YES_150NaCl	JB1197	0.904557877	0.510491004
YES_150NaCl	JB1205	0.65771745	0.375665776
YES_150NaCl	JB1206	0.762380601	0.347488113
YES_150NaCl	JB1207	0.980867099	0.552797124
YES_150NaCl	JB22	0.9938777	0.974698023
YES_150NaCl	JB4	2.062227705	1.723644513
YES_150NaCl	JB758	1.146651055	1.147983371
YES_150NaCl	JB760	1.590932949	1.504835084
YES_150NaCl	JB762	0.660319753	0.490163136
YES_150NaCl	JB837	0.452468806	0.211841086
YES_150NaCl	JB838	0.436266946	0.320647674
YES_150NaCl	JB840	0.967026956	0.558536357
YES_150NaCl	JB841	0.461964695	0.252552992
YES_150NaCl	JB842	0.599336323	0.352927032
YES_150NaCl	JB845	0.911008726	0.58428239
YES_150NaCl	JB846	0.772296186	0.552812926
YES_150NaCl	JB848	1.117503706	0.747086051
YES_150NaCl	JB852	0.278739277	0.13323812
YES_150NaCl	JB853	1.135112209	0.793600222
YES_150NaCl	JB854	1.102878094	0.67510232
YES_150NaCl	JB858	0.476683149	0.215457724
YES_150NaCl	JB862	0.820701597	0.447868335
YES_150NaCl	JB864	0.719083047	0.408725413
YES_150NaCl	JB869	0.77816143	0.716730309
YES_150NaCl	JB870	0.507111882	0.288542872
YES_150NaCl	JB871	0.743521743	0.104587841
YES_150NaCl	JB872	0.417180768	0.351236789
YES_150NaCl	JB873	0.911115736	0.59021521
YES_150NaCl	JB874	0.782378162	0.701566004
YES_150NaCl	JB875	0.697075029	0.308641716
YES_150NaCl	JB878	1.067271699	0.7134249
YES_150NaCl	JB879	1.939346781	1.753449356
YES_150NaCl	JB884	0.843962583	0.624337784
YES_150NaCl	JB899	1.109858874	1.116849492
YES_150NaCl	JB900	1.280295609	1.019364277
YES_150NaCl	JB902	1.991154229	1.807137547
YES_150NaCl	JB910	0.721184624	0.580451267
YES_150NaCl	JB913	0.638172762	0.549644211
YES_150NaCl	JB914	0.478105838	0.084812077
YES_150NaCl	JB916	0.572195009	0.581311705
YES_150NaCl	JB917	1.447418123	1.606341257
YES_150NaCl	JB918	0.755220286	0.336987275
YES_150NaCl	JB929	0.880081004	0.607428903
YES_150NaCl	JB930	0.864019343	0.509770138
YES_150NaCl	JB931	0.866619137	0.762989931
YES_150NaCl	JB934	0.682207721	0.371288321
YES_150NaCl	JB938	1.037790326	0.975132262
YES_150NaCl	JB939	0.476643587	0.230051681
YES_150NaCl	JB942	0.975222695	1.003120539
YES_150NaCl	JB943	0.536707072	0.274395477
YES_150NaCl	JB953	1.230321234	0.463085249
YES_150NaCl	extragrid	0.970252191	0.987353859
YES_150NaCl	grid	1	1
